# Supplementary material for: Mutation analysis of second primary tumors in head and neck cancer in Taiwanese patients through next-generation sequencing
Source: Research Square preprint supplement (doi:10.21203/rs.3.rs-948491/v1), 2021-10-05
Supplement: Supplementary file 1 [file 006f2de42d30caccbf80ffab.xlsx]

## Sheet: Table S3
Table S3. Overview of 297 verified mutations
chr	pos	ref	var	Gene name	Nucleotide change	RS ID in dbSNP147	COSMIC ID	TCGA		Type	Amino acid change
chr5	131296221	T	C	ACSL6	c.1951A>G	rs200587334				nonsynonymous SNV	p.T651A
chr12	43822472	G	T	ADAMTS20	c.3620C>A					nonsynonymous SNV	p.P1207H
chr12	43822494	C	A	ADAMTS20	c.3598G>T					stopgain	p.E1200X
chr12	43886318	G	A	ADAMTS20	c.1066C>T					nonsynonymous SNV	p.L356F
chr12	43821155	C	A	ADAMTS20	c.4063G>T	rs77744537				nonsynonymous SNV	p.G1355C
chr12	43823484	G	A	ADAMTS20	c.3425C>T		COSM4489058;COSM4489059;COSM4489060	BRCA;DLBC;HNSC;		nonsynonymous SNV	p.T1142I
chr12	43860480	G	A	ADAMTS20	c.1342C>T	rs779463831	COSM4659582;COSM4659580;COSM4659581	HNSC;		nonsynonymous SNV	p.R448W
chr8	37699385	C	A	ADGRA2	c.3529C>A	rs745338333		UCEC;		nonsynonymous SNV	p.H1177N
chr4	62845387	G	A	ADGRL3	c.2708G>A	rs771097660	COSM5709292;COSM5709290;COSM5709291;COSM5709293			nonsynonymous SNV	p.R903Q
chr2	100170944	C	T	AFF3	c.3463G>A	rs143764541				nonsynonymous SNV	p.V1155M
chr11	67258438	C	T	AIP	c.790C>T	rs188965257	COSM1182326			nonsynonymous SNV	p.R264W
chr14	105239254	G	T	AKT1	c.1133C>A					nonsynonymous SNV	p.S378Y
chr12	112237764	G	T	ALDH2	c.1303G>T					nonsynonymous SNV	p.G435W
chr5	112175606	C	T	APC	c.4315C>T		COSM6475570			nonsynonymous SNV	p.P1439S
chr19	1467990	A	G	APC2	c.4690A>G	rs775194743		SKCM;		nonsynonymous SNV	p.T1564A
chr11	120352086	A	C	ARHGEF12	c.4298A>C					nonsynonymous SNV	p.H1433P
chr11	120300425	T	A	ARHGEF12	c.611T>A			STAD;		stopgain	p.L204X
chr6	157099982	GGCGGCGGC	-	ARID1B	c.919_927del	rs757008446				nonframeshift deletion	p.307_309del
chr6	157488212	T	C	ARID1B	c.2879T>C	rs370071892	COSM3727066;COSM3727065			nonsynonymous SNV	p.M960T
chr19	966800	G	A	ARID3A	c.1427G>A	rs559697185				nonsynonymous SNV	p.R476H
chr19	929598	C	T	ARID3A	c.70C>T	rs773745826				nonsynonymous SNV	p.R24W
chr14	58831035	T	C	ARID4A	c.2228T>C					nonsynonymous SNV	p.I743T
chr1	235345671	C	G	ARID4B	c.2563G>C					nonsynonymous SNV	p.E855Q
chr1	235377301	CTT	-	ARID4B	c.1622_1624del	rs772808423				nonframeshift deletion	p.541_542del
chr2	97216953	G	T	ARID5A	c.850G>T	rs572910534				nonsynonymous SNV	p.V284L
chr10	63816906	A	T	ARID5B	c.148A>T					stopgain	p.K50X
chr10	63851054	C	T	ARID5B	c.1103C>T	rs117757404				nonsynonymous SNV	p.T368M
chr10	63851828	C	A	ARID5B	c.1877C>A	rs201944744	COSM1348523;COSM5826734			nonsynonymous SNV	p.S626Y
chrX	76939918	A	G	ATRX	c.830T>C		COSM4111163;COSM4111162			nonsynonymous SNV	p.V277A
chr3	187446937	T	A	BCL6	c.1256A>T	rs747683215				nonsynonymous SNV	p.E419V
chr13	32914814	C	T	BRCA2	c.6322C>T	rs55794205				nonsynonymous SNV	p.R2108C
chr13	32912582	A	G	BRCA2	c.4090A>G	rs56248502				nonsynonymous SNV	p.I1364V
chr13	32911045	C	G	BRCA2	c.2553C>G		COSM946776;COSM946775			nonsynonymous SNV	p.F851L
chr9	136901402	G	C	BRD3	c.1688C>G					stopgain	p.S563X
chr19	15349729	C	T	BRD4	c.3845G>A					nonsynonymous SNV	p.R1282H
chr17	59760708	G	T	BRIP1	c.3699C>A					nonsynonymous SNV	p.N1233K
chr17	59793364	G	A	BRIP1	c.2440C>T	rs201869624				nonsynonymous SNV	p.R814C
chr17	59821822	T	C	BRIP1	c.2228A>G	rs750033391				nonsynonymous SNV	p.Y743C
chr12	1953617	C	A	CACNA2D4	c.2421G>T					nonsynonymous SNV	p.E807D
chr2	202149550	A	G	CASP8	c.769A>G					nonsynonymous SNV	p.T257A
chr2	202137464	T	G	CASP8	c.515T>G					nonsynonymous SNV	p.L172R
chr2	202149867	-	C	CASP8	c.1087dupC					frameshift insertion	p.E362fs
chr2	202141586	C	T	CASP8	c.652C>T	rs760898260	COSM1482637;COSM1482636;COSM1482635			nonsynonymous SNV	p.R218W
chr2	202136252	C	T	CASP8	c.319C>T		COSM3724386;COSM3724387;COSM3724385			stopgain	p.Q107X
chr2	202131514	G	A	CASP8	c.305G>A			MESO;		nonsynonymous SNV	p.R102K
chr11	119156112	C	T	CBL	c.1777C>T	rs776999573				nonsynonymous SNV	p.R593W
chr5	149784289	C	T	CD74	c.579G>A	rs375690781				nonsynonymous SNV	p.M193I
chr20	3782594	C	G	CDC25B	c.753C>G	rs200104998	COSM3291152;COSM3291153	LIHC;		nonsynonymous SNV	p.C251W
chr16	68846047	A	G	CDH1	c.1018A>G	rs116093741	COSM19821			nonsynonymous SNV	p.T340A
chr16	64981699	G	A	CDH11	c.1820C>T	rs555349824				nonsynonymous SNV	p.T607M
chr16	66436824	G	A	CDH5	c.2107G>A	rs777969255	COSM4061667			nonsynonymous SNV	p.G703R
chr9	21971120	G	A	CDKN2A	c.238C>T	rs121913388	COSM12475;COSM1314729;COSM99191;COSM99935			stopgain	p.R80X
chr9	21971115	GGGTCGGGTGAGAGTGGCG	-	CDKN2A	c.225_243del	rs730881674	COSM1247968;COSM1247969;COSM51346;COSM5608120			frameshift deletion	p.P75fs
chr9	21971111	G	A	CDKN2A	c.247C>T	rs121913385	COSM99723;COSM12504;COSM99724;COSM1650884	BLCA;BRCA;COAD;ESCA;GBM;HNSC;KICH;LGG;LUAD;LUSC;OV;PAAD;PRAD;READ;SKCM;STAD;UCEC;		nonsynonymous SNV	p.H83Y
chr9	21971138	C	A	CDKN2A	c.220G>T	rs760640852	COSM12509;COSM4388602;COSM4388604;COSM4388603	BLCA;COAD;LUSC;MESO;OV;UCS;		nonsynonymous SNV	p.D74Y
chr20	40126851	G	T	CHD6	c.931C>A					nonsynonymous SNV	p.P311T
chr16	11002917	G	A	CIITA	c.2689G>A					nonsynonymous SNV	p.E897K
chr22	19213779	T	C	CLTCL1	c.1910A>G	rs185415005				nonsynonymous SNV	p.K637R
chr22	19217428	TTC	-	CLTCL1	c.1713_1715del	rs782000633				nonframeshift deletion	p.571_572del
chr9	123875856	C	T	CNTRL	c.1199C>T					nonsynonymous SNV	p.T400I
chr9	123924410	G	A	CNTRL	c.3628G>A	rs142421680				nonsynonymous SNV	p.E1210K
chr9	123924443	G	A	CNTRL	c.3661G>A	rs754312098		BLCA;BRCA;COAD;ESCA;HNSC;KICH;LGG;LUAD;LUSC;STAD;		nonsynonymous SNV	p.A1221T
chr16	3832738	T	C	CREBBP	c.1406A>G	rs766320521				nonsynonymous SNV	p.Q469R
chr5	149459899	T	C	CSF1R	c.308A>G					nonsynonymous SNV	p.D103G
chr8	113933888	G	A	CSMD3	c.1289C>T					nonsynonymous SNV	p.A430V
chr8	113304883	A	C	CSMD3	c.8164T>G	rs555061908				nonsynonymous SNV	p.F2722V
chr8	113323297	C	G	CSMD3	c.7483G>C	rs759447581				nonsynonymous SNV	p.G2495R
chr10	68381521	T	C	CTNNA3	c.1303A>G	rs377404952				nonsynonymous SNV	p.M435V
chr2	38301673	C	T	CYP1B1	c.859G>A	rs201544164				nonsynonymous SNV	p.A287T
chr1	162745627	C	T	DDR2	c.2042C>T	rs201701502				nonsynonymous SNV	p.T681I
chr6	56362824	G	A	DST	c.13567C>T					stopgain	p.Q4523X
chr6	56484876	G	T	DST	c.3956C>A	rs142302277				nonsynonymous SNV	p.A1319E
chr6	56484743	TTC	-	DST	c.4087_4089del	rs780085037	COSM1080687;COSM1080688			nonframeshift deletion	p.1363_1363del
chr7	55233052	G	A	EGFR	c.1802G>A	rs201498575				nonsynonymous SNV	p.G601E
chr7	73480318	C	T	ELN	c.2077C>T	rs369804770				nonsynonymous SNV	p.P693S
chr7	73466143	C	G	ELN	c.863C>G	rs782549041				nonsynonymous SNV	p.A288G
chr2	42557157	C	G	EML4	c.2582C>G					nonsynonymous SNV	p.S861C
chr22	41574580	G	A	EP300	c.6865G>A					nonsynonymous SNV	p.A2289T
chr22	41574780	G	C	EP300	c.7065G>C					nonsynonymous SNV	p.Q2355H
chr22	41569728	G	A	EP300	c.4719G>A					nonsynonymous SNV	p.M1573I
chr12	132512072	C	T	EP400	c.5105C>T	rs756329668		BLCA;HNSC;KIRP;LUSC;PAAD;PRAD;SKCM;STAD;THCA;		nonsynonymous SNV	p.T1702I
chr12	132547161	C	T	EP400	c.8249C>T	rs143981004		LUAD;		nonsynonymous SNV	p.T2750M
chr12	132512827	T	C	EP400	c.5375T>C	rs371508481		STAD;		nonsynonymous SNV	p.I1792T
chr4	66231746	C	A	EPHA5	c.1957G>T					nonsynonymous SNV	p.D653Y
chr4	66280107	C	A	EPHA5	c.1582G>T					stopgain	p.E528X
chr3	134644679	C	T	EPHB1	c.80C>T	rs773064927		GBM;		nonsynonymous SNV	p.T27M
chr7	142562144	G	A	EPHB6	c.586G>A	rs200894619				nonsynonymous SNV	p.V196I
chr1	51938620	C	T	EPS15	c.76G>A					nonsynonymous SNV	p.V26I
chr12	56495328	G	A	ERBB3	c.3518G>A	rs138861245	COSM1580861;COSM1580862			nonsynonymous SNV	p.R1173Q
chr2	212566890	C	T	ERBB4	c.1291G>A					nonsynonymous SNV	p.G431S
chr19	45867333	C	T	ERCC2	c.860G>A	rs765839639				nonsynonymous SNV	p.R287H
chr16	14041998	C	G	ERCC4	c.2545C>G	rs374186605				nonsynonymous SNV	p.Q849E
chr7	14027789	C	T	ETV1	c.55G>A	rs535092479				nonsynonymous SNV	p.G19R
chr17	41610083	A	C	ETV4	c.770T>G		COSM4130117			nonsynonymous SNV	p.V257G
chr8	118834816	G	T	EXT1	c.1305C>A	rs183760697				nonsynonymous SNV	p.F435L
chr16	89836981	G	C	FANCA	c.2213C>G	rs762333391				nonsynonymous SNV	p.P738R
chr14	45645292	G	A	FANCM	c.3257G>A					nonsynonymous SNV	p.G1086E
chr14	45644953	C	T	FANCM	c.2918C>T	rs148304968	COSM3744333			nonsynonymous SNV	p.P973L
chr14	45623933	A	T	FANCM	c.1139A>T			UCEC;		nonsynonymous SNV	p.N380I
chr4	153253772	A	C	FBXW7	c.607T>G					nonsynonymous SNV	p.W203G
chr4	153247175	T	C	FBXW7	c.1273A>G		COSM123131;COSM123129;COSM4976813;COSM123130;COSM123128			nonsynonymous SNV	p.R425G
chr8	38297862	T	C	FGFR1	c.29A>G					nonsynonymous SNV	p.E10G
chr17	17127352	G	A	FLCN	c.502C>T	rs587778367		HNSC;		nonsynonymous SNV	p.R168C
chr13	28611358	C	T	FLT3	c.1273G>A	rs200949858				nonsynonymous SNV	p.A425T
chr5	180043435	C	A	FLT4	c.3151G>T					nonsynonymous SNV	p.V1051L
chr6	41566646	A	G	FOXP4	c.2015A>G	rs746495264				nonsynonymous SNV	p.E672G
chr2	166618504	CTGA	-	GALNT3	c.746_749del	rs774681591		LUAD;		frameshift deletion	p.V249fs
chr17	9862547	T	C	GAS7	c.305A>G					nonsynonymous SNV	p.K102R
chr11	106849369	G	A	GUCY1A2	c.463C>T					nonsynonymous SNV	p.L155F
chr7	43508579	C	T	HECW1	c.2872C>T		COSM5003054;COSM5003055			nonsynonymous SNV	p.R958W
chr12	54367410	G	A	HOXC11	c.385G>A	rs202055341		BLCA;ESCA;HNSC;LUAD;PAAD;SKCM;STAD;		nonsynonymous SNV	p.A129T
chr2	176972817	G	A	HOXD11	c.734G>A	rs376305712				nonsynonymous SNV	p.G245D
chr11	533874	T	A	HRAS	c.182A>T	rs121913233	COSM498;COSM99664			nonsynonymous SNV	p.Q61L
chr11	534289	C	T	HRAS	c.34G>A	rs104894229	COSM480;COSM1746299	UCEC;		nonsynonymous SNV	p.G12S
chr6	160445671	G	A	IGF2R	c.581G>A					nonsynonymous SNV	p.G194D
chr9	34660537	C	T	IL11RA	c.1109C>T	rs35066989		BLCA;LIHC;		nonsynonymous SNV	p.A370V
chr5	35871197	G	T	IL7R	c.419G>T					nonsynonymous SNV	p.R140L
chr12	6762189	T	C	ING4	c.304A>G			STAD;		nonsynonymous SNV	p.T102A
chr6	393213	A	C	IRF4	c.61A>C			SARC;		nonsynonymous SNV	p.N21H
chr13	110436111	C	A	IRS2	c.2290G>T	rs757014259				nonsynonymous SNV	p.G764W
chr5	52368525	A	G	ITGA2	c.2429A>G	rs191616009				nonsynonymous SNV	p.Q810R
chr19	17942173	G	A	JAK3	c.2842C>T	rs200202992	COSM123817;COSM1579128			nonsynonymous SNV	p.R948C
chr19	17951088	C	T	JAK3	c.1205G>A	rs767428670	COSM4075502;COSM4075501			nonsynonymous SNV	p.R402H
chr10	76788267	A	G	KAT6B	c.3136A>G	rs182978198				nonsynonymous SNV	p.S1046G
chr4	55968136	C	T	KDR	c.2194G>A	rs747362899	COSM1430216			nonsynonymous SNV	p.E732K
chr4	55955966	G	A	KDR	c.3196C>T	rs757722266	COSM3301530			nonsynonymous SNV	p.R1066C
chr7	138545935	G	T	KIAA1549	c.5197C>A	rs572611406				nonsynonymous SNV	p.Q1733K
chr7	138593744	G	A	KIAA1549	c.3269C>T	rs377595061		LIHC;		nonsynonymous SNV	p.T1090M
chr13	33591263	G	C	KL	c.685G>C	rs202102399				nonsynonymous SNV	p.G229R
chr13	33634997	G	A	KL	c.1781G>A	rs766859418	COSM6230735			nonsynonymous SNV	p.R594H
chr11	118342517	T	C	KMT2A	c.643T>C	rs782430019				nonsynonymous SNV	p.S215P
chr19	36218158	G	T	KMT2B	c.4105G>T					stopgain	p.E1369X
chr12	49443500	G	A	KMT2D	c.3871C>T					nonsynonymous SNV	p.R1291W
chr12	49431727	TA	-	KMT2D	c.9411_9412del					frameshift deletion	p.A3137fs
chr12	25362756	CTT	-	KRAS	c.538_540del	rs749587181	COSM2202548			nonframeshift deletion	p.180_180del
chr12	25398285	C	G	KRAS	c.34G>C	rs121913530	COSM518;COSM1157797			nonsynonymous SNV	p.G12R
chr18	7013921	C	T	LAMA1	c.3256G>A	rs201831309				nonsynonymous SNV	p.D1086N
chr6	129475707	G	T	LAMA2	c.1085G>T	rs182958473				nonsynonymous SNV	p.R362I
chr6	129475706	A	T	LAMA2	c.1084A>T	rs191912891				stopgain	p.R362X
chr6	129781360	C	T	LAMA2	c.6883C>T	rs773802779				nonsynonymous SNV	p.R2295C
chr20	60885789	C	T	LAMA5	c.10378G>A					nonsynonymous SNV	p.E3460K
chr20	60922026	C	T	LAMA5	c.1015G>A	rs536322214				nonsynonymous SNV	p.G339S
chr1	183194828	C	T	LAMC2	c.1039C>T	rs188149266				nonsynonymous SNV	p.R347C
chr13	39918141	C	T	LHFP	c.535G>A	rs367901772				nonsynonymous SNV	p.A179T
chr3	188327154	C	T	LPP	c.635C>T	rs150830431				nonsynonymous SNV	p.T212M
chr3	188326974	C	T	LPP	c.455C>T	rs755340785				nonsynonymous SNV	p.P152L
chr2	141474307	T	A	LRP1B	c.5837A>T	rs776616686				nonsynonymous SNV	p.D1946V
chr2	141763011	C	T	LRP1B	c.2396G>A	rs201695614	COSM3117550			nonsynonymous SNV	p.R799Q
chr15	41796779	C	T	LTK	c.1790G>A	rs199935291				nonsynonymous SNV	p.R597H
chr15	41804033	-	CCCCCGCCA	LTK	c.638_639insTGGCGGGGG	rs778703217				nonframeshift insertion	p.G213delinsGGGG
chr6	43607974	G	A	MAD2L1BP	c.625G>A		COSM5996554			nonsynonymous SNV	p.V209M
chr6	161413051	C	T	MAP3K4	c.88C>T	rs771440561				nonsynonymous SNV	p.P30S
chr2	136624256	T	C	MCM6	c.658A>G	rs564808114		BLCA;		nonsynonymous SNV	p.I220V
chr2	136620253	C	T	MCM6	c.1144G>A			SKCM;STAD;		nonsynonymous SNV	p.E382K
chr3	168802737	G	A	MECOM	c.3311C>T	rs201825977	COSM4115102;COSM4115101			nonsynonymous SNV	p.A1104V
chr7	116414962	G	A	MET	c.3056G>A					nonsynonymous SNV	p.G1019D
chr7	116340201	G	A	MET	c.1063G>A	rs561295443				nonsynonymous SNV	p.E355K
chr7	116436123	A	T	MET	c.4118A>T	rs773898036				nonsynonymous SNV	p.D1373V
chr22	40814538	A	G	MKL1	c.1904T>C					nonsynonymous SNV	p.V635A
chr22	40816543	G	C	MKL1	c.919C>G	rs753496354				nonsynonymous SNV	p.P307A
chr3	37067437	G	T	MLH1	c.1348G>T	rs752622244				nonsynonymous SNV	p.D450Y
chr3	37092133	G	A	MLH1	c.2260G>A	rs864622445				nonsynonymous SNV	p.E754K
chr22	28194849	C	T	MN1	c.1683G>A					nonsynonymous SNV	p.M561I
chr2	47635594	T	C	MSH2	c.266T>C					nonsynonymous SNV	p.V89A
chr2	48030591	G	C	MSH6	c.3205G>C	rs764113705		BLCA;		nonsynonymous SNV	p.G1069R
chr1	11270951	T	A	MTOR	c.3574A>T					nonsynonymous SNV	p.I1192F
chr1	237058734	C	A	MTR	c.3482C>A		COSM4135601			nonsynonymous SNV	p.A1161E
chr13	30054427	G	A	MTUS2	c.3355G>A	rs750780619				nonsynonymous SNV	p.E1119K
chr16	15841566	G	T	MYH11	c.2293C>A	rs147056835				nonsynonymous SNV	p.P765T
chr16	15932077	C	A	MYH11	c.33G>T	rs148562366				nonsynonymous SNV	p.E11D
chr1	171621616	G	A	MYOC	c.136C>T	rs74315337				stopgain	p.R46X
chr8	71050489	C	T	NCOA2	c.3107G>A					stopgain	p.W1036X
chr8	71068403	C	T	NCOA2	c.2197G>A					nonsynonymous SNV	p.E733K
chr8	71056912	A	G	NCOA2	c.2777T>C	rs778701184				nonsynonymous SNV	p.I926T
chr9	14088246	C	T	NFIB	c.880G>A	rs746745207		BRCA;COAD;ESCA;GBM;HNSC;LGG;LUAD;OV;PRAD;SARC;SKCM;STAD;UCEC;		nonsynonymous SNV	p.G294S
chr4	103527699	A	C	NFKB1	c.1796A>C	rs55661548				nonsynonymous SNV	p.E599A
chr14	51273461	C	T	NIN	c.259G>A	rs745467220				nonsynonymous SNV	p.E87K
chr14	51221305	C	G	NIN	c.2571G>C	rs746453080				nonsynonymous SNV	p.K857N
chr14	51196324	G	A	NIN	c.3856C>T	rs144624455	COSM2152026;COSM2152024;COSM2152025;COSM3401335			nonsynonymous SNV	p.R1286C
chr17	5433981	C	A	NLRP1	c.3352G>T	rs757904290				nonsynonymous SNV	p.G1118C
chr9	139395196	G	C	NOTCH1	c.5742C>G					nonsynonymous SNV	p.I1914M
chr9	139418317	AT	-	NOTCH1	c.254_255del					frameshift deletion	p.Y85fs
chr9	139413085	G	A	NOTCH1	c.1057C>T		COSM753114;COSM753115			nonsynonymous SNV	p.R353C
chr9	139401330	G	A	NOTCH1	c.3739C>T			HNSC;		stopgain	p.Q1247X
chr9	139396757	C	T	NOTCH1	c.5351G>A		COSM5880095	PRAD;		nonsynonymous SNV	p.R1784Q
chr9	139412376	G	C	NOTCH1	c.1269C>G			READ;		nonsynonymous SNV	p.C423W
chr19	15290180	G	A	NOTCH3	c.3455C>T	rs371437217				nonsynonymous SNV	p.T1152M
chr9	102595766	G	T	NR4A3	c.1284G>T	rs537327709				nonsynonymous SNV	p.M428I
chr8	32600224	-	A	NRG1	c.665dupA					frameshift insertion	p.Q222fs
chr1	156838380	C	T	NTRK1	c.568C>T	rs202030811		UCS;		nonsynonymous SNV	p.R190W
chr11	71715327	G	A	NUMA1	c.6025C>T	rs202117024				nonsynonymous SNV	p.R2009C
chr9	134019982	C	G	NUP214	c.1610C>G					nonsynonymous SNV	p.S537C
chr9	134019967	C	T	NUP214	c.1595C>T	rs189969939				nonsynonymous SNV	p.P532L
chr11	3704591	G	T	NUP98	c.4757C>A	rs751180316				nonsynonymous SNV	p.T1586N
chr11	3756554	G	T	NUP98	c.1460C>G	rs766421203				nonsynonymous SNV	p.A487G
chr11	3756554	G	C	NUP98	c.1460C>G	rs766421203				nonsynonymous SNV	p.A487G
chr11	3723971	G	C	NUP98	c.3234C>G	rs776659810				nonsynonymous SNV	p.F1078L
chr10	81463533	T	-	NUTM2B	c.168delT					frameshift deletion	p.P56fs
chr10	81471802	C	A	NUTM2B	c.2198C>A			COAD;GBM;		nonsynonymous SNV	p.A733D
chr9	95179780	G	A	OMD	c.61C>T					stopgain	p.Q21X
chr9	37002653	C	T	PAX5	c.596G>A		COSM5411081			nonsynonymous SNV	p.R199K
chr1	19071367	G	A	PAX7	c.1462G>A	rs577652552	COSM3771562			nonsynonymous SNV	p.G488R
chr3	52676029	G	C	PBRM1	c.1028C>G		COSM5648965;COSM5648964;COSM5648963			stopgain	p.S343X
chr4	55136880	C	A	PDGFRA	c.1202C>A	rs397514549	COSM1581435			nonsynonymous SNV	p.A401D
chrX	133551275	A	C	PHF6	c.911A>C	rs757401276				nonsynonymous SNV	p.H304P
chr3	138413665	C	T	PIK3CB	c.391G>A	rs762171492		HNSC;LUSC;		nonsynonymous SNV	p.V131I
chr7	106508220	G	A	PIK3CG	c.214G>A					nonsynonymous SNV	p.A72T
chr7	106509874	A	C	PIK3CG	c.1868A>C			KIRC;		nonsynonymous SNV	p.D623A
chr5	67522747	A	G	PIK3R1	c.244A>G					nonsynonymous SNV	p.I82V
chr5	67591136	-	GAG	PIK3R1	c.640_641insGAG					nonframeshift insertion	p.R214delinsRG
chr6	51923351	A	-	PKHD1	c.1282delT					frameshift deletion	p.W428fs
chr6	51934321	T	C	PKHD1	c.712A>G	rs760274684				nonsynonymous SNV	p.M238V
chr6	51921535	G	A	PKHD1	c.1654C>T	rs748509463		UCEC;		nonsynonymous SNV	p.L552F
chr16	81946207	A	C	PLCG2	c.1940A>C	rs751244429				nonsynonymous SNV	p.Y647S
chr16	81971501	C	G	PLCG2	c.3191C>G	rs766651721				nonsynonymous SNV	p.T1064R
chr1	6534182	A	G	PLEKHG5	c.650T>C	rs140817021				nonsynonymous SNV	p.M217T
chr12	133220496	A	G	POLE	c.4217T>C	rs749250454				nonsynonymous SNV	p.M1406T
chr3	12475486	C	A	PPARG	c.1276C>A					nonsynonymous SNV	p.P426T
chr1	212459483	G	C	PPP2R5A	c.31G>C	rs753173935				nonsynonymous SNV	p.A11P
chr6	106553135	C	T	PRDM1	c.1100C>T	rs372820369				nonsynonymous SNV	p.S367F
chr1	3328203	C	G	PRDM16	c.1442C>G					nonsynonymous SNV	p.A481G
chr1	3102751	G	A	PRDM16	c.100G>A	rs187194973	COSM5053382			nonsynonymous SNV	p.A34T
chr20	40827915	C	G	PTPRT	c.2456G>C	rs749979947				nonsynonymous SNV	p.G819A
chr14	69077877	G	T	RAD51B	c.925G>T	rs562299209				nonsynonymous SNV	p.A309S
chr17	56772535	-	A	RAD51C	c.390dupA	rs730881940				frameshift insertion	p.G130fs
chr4	160277266	G	T	RAPGEF2	c.4430G>T					nonsynonymous SNV	p.R1477L
chr8	145738792	C	T	RECQL4	c.2273G>A	rs748416710		BLCA;		nonsynonymous SNV	p.R758Q
chr1	182555647	C	T	RNASEL	c.295G>A		COSM900686			nonsynonymous SNV	p.A99T
chr17	78302241	C	A	RNF213	c.3481C>A					nonsynonymous SNV	p.L1161M
chr17	78269536	T	A	RNF213	c.1935T>A					stopgain	p.C645X
chr17	78298927	C	T	RNF213	c.3122C>T	rs138825989				nonsynonymous SNV	p.A1041V
chr17	78320261	G	C	RNF213	c.8126G>C	rs185670413				nonsynonymous SNV	p.R2709T
chr17	78360097	G	C	RNF213	c.14587G>C	rs760732823				nonsynonymous SNV	p.D4863H
chr6	117680982	G	C	ROS1	c.3638C>G					nonsynonymous SNV	p.S1213C
chr6	117609935	G	A	ROS1	c.6764C>T	rs538891848				nonsynonymous SNV	p.S2255L
chr6	117609936	A	G	ROS1	c.6763T>C	rs547573917				nonsynonymous SNV	p.S2255P
chr3	128345606	G	C	RPN1	c.1106C>G	rs776506560				nonsynonymous SNV	p.T369S
chr7	92735314	T	C	SAMD9	c.97A>G	rs148617088				nonsynonymous SNV	p.R33G
chr7	92735316	T	A	SAMD9	c.95A>T	rs746748986				nonsynonymous SNV	p.H32L
chr9	136535847	C	T	SARDH	c.2354G>A	rs766107812	COSM3788202;COSM3788201			nonsynonymous SNV	p.R785Q
chr3	47155487	G	A	SETD2	c.4594C>T					nonsynonymous SNV	p.R1532W
chr2	198270046	G	A	SF3B1	c.1390C>T		COSM3838224			nonsynonymous SNV	p.L464F
chr16	3639087	C	T	SLX4	c.4552G>A	rs760096901				nonsynonymous SNV	p.E1518K
chr15	67479829	G	T	SMAD3	c.821G>T					nonsynonymous SNV	p.G274V
chr19	11152097	C	T	SMARCA4	c.4285C>T			BLCA;CHOL;COAD;LUAD;PAAD;PRAD;SKCM;TGCT;		nonsynonymous SNV	p.R1429C
chr7	128843429	C	T	SMO	c.536C>T	rs115491500		HNSC;		nonsynonymous SNV	p.T179M
chr2	5833718	G	A	SOX11	c.865G>A		COSM5034479			nonsynonymous SNV	p.E289K
chr1	16260227	G	C	SPEN	c.7492G>C	rs762917463				nonsynonymous SNV	p.V2498L
chr1	16259330	G	T	SPEN	c.6595G>T	rs550359408	COSM4919594			nonsynonymous SNV	p.A2199S
chr3	9032335	G	A	SRGAP3	c.2675C>T	rs778388441	COSM1227556			nonsynonymous SNV	p.T892M
chr6	144508591	G	A	STX11	c.827G>A		COSM4730717			nonsynonymous SNV	p.R276Q
chr19	7708086	G	A	STXBP2	c.1053G>A	rs752730714				nonsynonymous SNV	p.M351I
chr19	7712373	G	A	STXBP2	c.1663G>A	rs758554274	COSM475480			nonsynonymous SNV	p.E555K
chr6	152546875	C	T	SYNE1	c.21119G>A					stopgain	p.W7040X
chr6	152737558	C	T	SYNE1	c.6035G>A					nonsynonymous SNV	p.R2012Q
chr6	152763282	C	G	SYNE1	c.3957G>C	rs200763530				nonsynonymous SNV	p.E1319D
chr6	152763266	C	G	SYNE1	c.3973G>C	rs201144728				nonsynonymous SNV	p.E1325Q
chr6	152451909	C	T	SYNE1	c.25955G>A	rs758942329				nonsynonymous SNV	p.R8652Q
chr6	152639220	T	C	SYNE1	c.16355A>G	rs773901491				nonsynonymous SNV	p.N5452S
chr6	152642914	G	A	SYNE1	c.15812C>T	rs202105931	COSM1074846;COSM1074847;COSM4866988;COSM1596051;COSM4866987			nonsynonymous SNV	p.T5271M
chr6	152751312	G	A	SYNE1	c.4744C>T	rs200424447	COSM3726495;COSM3726493;COSM3726496;COSM3726497;COSM3726494			nonsynonymous SNV	p.L1582F
chr6	152762266	T	A	SYNE1	c.4169A>T			BRCA;LGG;		nonsynonymous SNV	p.K1390M
chr9	32634586	G	A	TAF1L	c.992C>T	rs138133234	COSM4774449			nonsynonymous SNV	p.T331M
chr1	47689714	T	G	TAL1	c.503A>C					nonsynonymous SNV	p.K168T
chr9	108424976	G	C	TAL2	c.199G>C	rs180763430				nonsynonymous SNV	p.G67R
chr18	53070861	G	T	TCF4	c.85C>A	rs139195893		LIHC;		nonsynonymous SNV	p.P29T
chr5	133481986	G	T	TCF7	c.1147G>T	rs199510883				nonsynonymous SNV	p.V383L
chr14	96178684	A	T	TCL1A	c.170T>A	rs763913610				nonsynonymous SNV	p.V57D
chrX	48887958	C	G	TFE3	c.1124G>C	rs149649619				nonsynonymous SNV	p.G375A
chr3	195800925	T	C	TFRC	c.310A>G	rs201408488				nonsynonymous SNV	p.T104A
chr3	30732963	G	A	TGFBR2	c.1651G>A		COSM4889224;COSM4889225			nonsynonymous SNV	p.E551K
chr15	39883524	G	A	THBS1	c.2386G>A	rs142600129				nonsynonymous SNV	p.A796T
chr5	170738433	G	A	TLX3	c.706G>A	rs748475771	COSM6300476			nonsynonymous SNV	p.A236T
chr21	42866423	A	G	TMPRSS2	c.209T>C	rs201093031				nonsynonymous SNV	p.V70A
chr3	172241114	T	A	TNFSF10	c.61A>T					nonsynonymous SNV	p.I21F
chr17	7577094	G	A	TP53	c.844C>T	rs28934574	COSM10704;COSM1636702;COSM3378339;COSM99925			nonsynonymous SNV	p.R282W
chr17	7574003	G	A	TP53	c.1024C>T	rs730882029	COSM11073;COSM99721			stopgain	p.R342X
chr17	7578403	C	A	TP53	c.527G>T		COSM3378352;COSM117396;COSM117398;COSM1640850;COSM117397;COSM117395;COSM10645			nonsynonymous SNV	p.C176F
chr17	7578209	G	C	TP53	c.640C>G		COSM4879592;COSM1637588;COSM1637585;COSM1637584;COSM1637586;COSM45115;COSM1637587			nonsynonymous SNV	p.H214D
chr17	7577508	T	C	TP53	c.773A>G		COSM4946285;COSM1564206;COSM1564205;COSM44168;COSM4946286			nonsynonymous SNV	p.E258G
chr17	7577500	T	-	TP53	c.781delA		COSM45813	BLCA;BRCA;HNSC;LUAD;PCPG;		frameshift deletion	p.S261fs
chr17	7577550	C	T	TP53	c.731G>A		COSM179808;COSM179810;COSM179809;COSM3717641;COSM1646854;COSM10883	BLCA;HNSC;		nonsynonymous SNV	p.G244D
chr17	7577509	C	T	TP53	c.772G>A	rs121912652	COSM1679494;COSM10988;COSM4271777;COSM1172461;COSM1172462	SKCM;		nonsynonymous SNV	p.E258K
chr1	186303597	A	G	TPR	c.5042T>C					nonsynonymous SNV	p.V1681A
chr16	2133780	C	T	TSC2	c.3968C>T	rs397515062				nonsynonymous SNV	p.A1323V
chr16	2136813	G	A	TSC2	c.4930G>A	rs137853999	COSM5551684;COSM5551683			nonsynonymous SNV	p.D1644N
chr14	81610465	A	C	TSHR	c.2063A>C					nonsynonymous SNV	p.D688A
chr14	81609751	G	A	TSHR	c.1349G>A	rs189261858				nonsynonymous SNV	p.R450H
chr14	81610468	T	G	TSHR	c.2066T>G	rs761341933				nonsynonymous SNV	p.V689G
chr19	10472598	C	T	TYK2	c.1807G>A	rs140594440	COSM4738524			nonsynonymous SNV	p.V603M
chr8	103284871	C	A	UBR5	c.6859G>T			HNSC;		stopgain	p.E2287X
chr2	234676979	A	C	UGT1A10	c.1189A>C	rs28934877				nonsynonymous SNV	p.N397H
chr8	31030599	G	A	WRN	c.4280G>A	rs61751045				nonsynonymous SNV	p.R1427K
chr3	14190206	A	G	XPC	c.2276T>C					nonsynonymous SNV	p.V759A
chr3	14199566	G	A	XPC	c.1817C>T					nonsynonymous SNV	p.T606I
chr18	22804449	C	T	ZNF521	c.2773G>A	rs770755347	COSM3734542	COAD;		nonsynonymous SNV	p.V925I
chr18	22804697	T	G	ZNF521	c.2525A>C	rs768520229		STAD;		nonsynonymous SNV	p.Q842P
