# Supplementary material for: Mutation analysis of second primary tumors in head and neck cancer in Taiwanese patients through next-generation sequencing
Source: Research Square preprint supplement (doi:10.21203/rs.3.rs-948491/v1), 2021-10-05
Supplement: Supplementary file 2 [file 4a6e0e24edd8819cf8c8c214.xlsx]

## Sheet: Table 02
Table 02. Unique mutation in first and second primary cancer
ID	Sample ID	Organization	Clinical Diagnosis	Unique mutation	Molecular identification
PA46	PM245	Buccal Mucosa	1st primary	NUP98:c.1460C>A
	PM558	Lip	2nd primary	CASP8:c.515T>G*; MLH1:c.2260G>A*; NOTCH1:c.5742C>G*; PIK3CG:c.214G>A*; SETD2:c.4594C>T*; ADAMTS20:c.1066C>T; FLCN:c.502C>T; NCOA2:c.2197G>A; SYNE1:c.21119G>A	primary
PA47	PM247	Gum	2nd primary	CASP8:c.1087dupC*; CIITA:c.2689G>A; EP400:c.5105C>T; LAMA5:c.10378G>A; NRG1:c.665dupA; NUP214:c.1610C>G
	PM571	Gum	3rd primary	HRAS:c.34G>A*; NOTCH1:c.5351G>A*; TP53:c.844C>T*; BRIP1:c.2228A>G	primary
PA49	PM251	Larynx	1st primary	TP53:c.773A>G*; ETV4:c.770T>G; CACNA2D4:c.2421G>T; EPHA5:c.1957G>T; RNF213:c.1935T>A; THBS1:c.2386G>A
	PM560	Gum	2nd primary	NUP98:c.1460C>G; LRP1B:c.2396G>A; SMAD3:c.821G>T; STX11:c.827G>A; SYNE1:c.4169A>T	primary
PA50	PM253	Gum	1st primary	N/A
	PM561	Gum	2nd primary	NUP98:c.1460C>G	recurrent
PA53	PM259	Buccal Mucosa	1st primary	N/A
	PM563	Tongue	2nd primary	N/A	recurrent
PA54	PM573	Buccal Mucosa	1st primary	CASP8:c.305G>A*; FBXW7:c.607T>G*; MET:c.3056G>A*; NOTCH1:c.1057C>T*; TGFBR2:c.1651G>A*; ADAMTS20:c.3598G>T
	PM261	Hypopharynx	2nd primary	N/A	primary
PA55	PM265	Gum	1st primary	N/A
	PM564	Gum	3rd primary	NUP98:c.1460C>G	recurrent
PA58	PM276	Buccal Mucosa	1st primary	NCOA2:c.3107G>A
	PM568	Gum	3rd primary	TP53:c.640C>G*	primary
PA60	PM281	Tongue	1st primary	AKT1:c.1133C>A*; ATRX:c.830T>C*; ARID4A:c.2228T>C; NUP98:c.1460C>G
	PM570	Esophagus	2nd primary	APC:c.4315C>T*; IL7R:c.419G>T*; TP53:c.781delA*; PPARG:c.1276C>A; PRDM16:c.1442C>G	primary
PA52	PM257	Tongue	1st primary	HRAS:c.34G>A*; BRD4:c.3845G>A
	PM562	Tongue	recurrent	CDKN2A:c.238C>T*; TP53:c.527G>T*; HECW1:c.2872C>T; TAL1:c.503A>C; UBR5:c.6859G>T	primary
PA56	PM267	Gum	1st primary	ERBB4:c.1291G>A*; PIK3R1:c.640_641insGAG*
	PM565	Lip	recurrent	APC2:c.4690A>G; DST:c.13567C>T; ZNF521:c.2773G>A	primary
PA57	PM269	Gum	1st primary	CASP8:c.652C>T*; FBXW7:c.1273A>G*; SMARCA4:c.4285C>T*; TP53:c.772G>A*; EPS15:c.76G>A; FANCM:c.3257G>A; MTR:c.3482C>A
	PM566	Buccal Mucosa	recurrent	CDKN2A:c.238C>T*; CASP8:c.319C>T*; ERCC2:c.860G>A*; HRAS:c.182A>T*; NOTCH1:c.254_255del*; PBRM1:c.1028C>G*; SF3B1:c.1390C>T*; ALDH2:c.1303G>T; ARID4B:c.2563G>C; EPHA5:c.1582G>T; GUCY1A2:c.463C>T; RAPGEF2:c.4430G>T; SYNE1:c.6035G>A; TSHR:c.2063A>C	primary
PA59	PM569	Oropharynx	1st primary	LTK:c.638_639insTGGCGGGGG; PKHD1:c.1282delT
	PM279	Buccal Mucosa	recurrent	CDKN2A:c.220G>T*	primary
PA48	PM249	Buccal Mucosa	1st primary	N/A
	PM559	Lung	2nd primary	NUP98:c.1460C>G	recurrent
PA51	PM572	Ureter	1st primary	TP53:c.844C>T*; ARID5B:c.148A>T*; BRCA2:c.2553C>G*; EP300:c.4719G>A*; KMT2D:c.9411_9412del*; KRAS:c.34G>C*; MTOR:c.3574A>T*; NUP98:c.1460C>G; BRD3:c.1688C>G; GAS7:c.305A>G; IRF4:c.61A>C; SOX11:c.865G>A; TCL1A:c.170T>A;
	PM255	Tongue	2nd primary	TP53:c.1024C>T*	primary
