# Supplementary material for: Mutation analysis of second primary tumors in head and neck cancer in Taiwanese patients through next-generation sequencing
Source: Research Square preprint supplement (doi:10.21203/rs.3.rs-948491/v1), 2021-10-05
Supplement: Supplementary file 3 [file 5a540b183fa7978c2f718e0b.xlsx]

## Sheet: Table S2
Table S2. Overview of reads count and quality control from NGS
Patient ID	Sample ID	Total raw reads	Total effective reads	Reads mapped to genome	Average sequencing depth on target	Coverage(%) on target
PA46	PM245	179140048	166047446	165990460	156.298	0.992077
PA46	PM558	168017156	156483988	156429310	148.203	0.993197
PA47	PM247	109629058	101208752	101034427	92.3722	0.990548
PA47	PM571	124553796	114808088	114789330	103.025	0.990477
PA48	PM249	136807506	126770434	126740965	122.116	0.989492
PA48	PM559	149998422	139404744	139375864	136.417	0.990868
PA49	PM251	128288700	118502382	118475718	114.076	0.990984
PA49	PM560	165352750	153531400	153481676	150.55	0.992998
PA50	PM253	143813882	133140012	133100415	128.571	0.991338
PA50	PM561	190605678	175634088	175569262	168.823	0.993499
PA51	PM572	197321744	180538908	180510951	170.71	0.992208
PA51	PM255	150926584	139004160	138974398	133.781	0.991655
PA52	PM257	135117384	125349870	125319275	121.942	0.99134
PA52	PM562	116527568	108443928	108426021	100.347	0.99196
PA53	PM259	195552594	183048896	183006543	171.091	0.992549
PA53	PM563	162026794	148948568	148925621	141.887	0.992202
PA54	PM573	162810662	150451708	150421973	132.593	0.991484
PA54	PM261	142360948	133546260	133511160	115.807	0.991148
PA55	PM265	165610242	155131392	155100511	143.988	0.991759
PA55	PM564	186880474	172435982	172410765	158.573	0.99244
PA56	PM267	158870968	148316540	148271246	142.578	0.991838
PA56	PM565	166291022	153376244	153339089	142.484	0.992174
PA57	PM269	192718788	180662438	180607786	175.213	0.992431
PA57	PM566	188374116	173511034	173472443	163.956	0.992756
PA58	PM276	189106458	173780890	173728250	163.771	0.993035
PA58	PM568	166487944	153773424	153724346	146.826	0.992399
PA59	PM569	175322940	161668758	161619725	141.746	0.992042
PA59	PM279	185501806	170278538	170243806	162.728	0.992879
PA60	PM281	182072508	165374098	165306341	158.351	0.992813
PA60	PM570	156926202	144334246	144302892	132.754	0.991718
	Average	1.62434e+08	1.5025e+08	1.50207e+08	141.386	0.991944
