# Supplementary material for: Mutation analysis of second primary tumors in head and neck cancer in Taiwanese patients through next-generation sequencing
Source: Research Square preprint supplement (doi:10.21203/rs.3.rs-948491/v1), 2021-10-05
Supplement: Supplementary file 4 [file a2735bdce14ed552e478a4b0.xlsx]

## Sheet: Table 01
Table 01: Population description and clinical information
ID	Gender	Betel	Alcohol	Smoking	Sample ID	Age at Surgery	Organization	Pathol. Diagnosis	Tumor size (cm)	pTNM	Stage (AJCC)	Clinical Diagnosis	CT	RT
PA46	M	+	+	-	PM245	64	Buccal Mucosa	SSC	4.0*2.0*0.4	pT2N2bcMx	IVA	1st primary	+	+
					PM558	68	Lip	SSC	3.2*3.2*0.8	ypT2N0cMx	IVA	2nd primary	-	-
PA47	M	-	-	-	PM247	58	Gum	SSC	13*5.5*6.5	pT3N0cM0	III	2nd primary	-	-
					PM571	62	Gum	SSC	2.8*2.2*0.4	pT2N0cMx	II	3rd primary	-	-
PA49	M	+	+	+	PM251	45	Larynx	SSC	3.5*3.5*3.0	pT4aN2cM0	IVA	1st primary	+	+
					PM560	51	Gum	SSC	3.0*2.5*1.5	ypT4aNxcM0	IVA	2nd primary	+	+
PA50	M	+	+	-	PM253	71	Gum	SSC	0.6*0.6*0.2	pT4aN0cM0	IVA	1st primary	-	+
					PM561	75	Gum	SSC	2.7*1.8*1.1	ypT4aNxcM0	IVA	2nd primary	+	+
PA53	M	+	+	+	PM259	40	Buccal Mucosa	SSC	2.3*1.8*0.4	pT2N2bcMx	IVA	1st primary	+	+
					PM563	42	Tongue	SSC	1.0*0.8*0.5	ypT1NxcM0	I	2nd primary	-	-
PA54	M	+	+	+	PM573	51	Buccal Mucosa	SSC	4.0*3.0*2.5	pT4aN0cM0	IVA	1st primary	-	+
					PM261	57	Hypopharynx	SSC	3.1*3.1*0.7	ypT2N0cM0	II	2nd primary	-	-
PA55	M	+	+	+	PM265	50	Gum	SSC	4.0*3.5*1.3	pT4aN2bcM0	IVA	1st primary	+	+
					PM564	55	Gum	SSC	2.4*1.5*1.5	pT4aN0M0	IVA	3rd primary	+	+
PA58	M	+	+	+	PM276	45	Buccal Mucosa	SSC	2.5*2.5*0.6	pT2N0cMx	II	1st primary	-	-
					PM568	49	Gum	SSC	3.0*1.8*1.0	pT4aN0cM0	IVA	3rd primary	+	+
PA60	M	+	+	+	PM281	46	Tongue	SSC	3.3*2.8*2.0	pT2N2bcMx	IVA	1st primary	+	+
					PM570	46	Esophagus	SSC	5.0*3.0*1.5	ypT4N1cMx	III	2nd primary	+	+
PA52	M	+	+	+	PM257	65	Tongue	SSC	1.7*1.7*1.0	pT1N0cMx	I	1st primary	-	-
					PM562	66	Tongue	SSC	4.3*4.1*1.4	rpT3N2bcM0	IVA	recurrent	+	+
PA56	M	+	+	+	PM267	56	Gum	SSC	3.0*1.3*1.3	pT2N0cM0	II	1st primary	-	-
					PM565	65	Lip	SSC	2.5*2.3*0.5	rpT1NxcM0	I	recurrent	-	-
PA57	M	+	+	+	PM269	51	Gum	SSC	3.0*2.0*2.0	pT4aN0cM0	IVA	1st primary	-	-
					PM566	57	Buccal Mucosa	SSC	5.3*5.3*1.4	rpT3NxM0	III	recurrent	+	+
PA59	M	+	+	+	PM569	47	Oropharynx	SSC	4.2*4.2*3.5	pT4N1cM0	IVA	1st primary	+	+
					PM279	55	Buccal Mucosa	SSC	3.3*2.2*1.5	yrpT4aN0cM0	IVA	recurrent	+	+
PA48	F	+	+	+	PM249	33	Buccal Mucosa	SSC	3.2*2.5*1.4	T2N0cM0	II	1st primary	+	+
					PM559	34	Lung	SSC	6.3*3.8*3.1	ypT3N1cM0	IIIA	2nd primary	-	+
PA51	M	+	+	+	PM572	70	Ureter	TCC	0.7*0.5*0.4	pT2NxcM0	II	1st primary	-	-
					PM255	76	Tongue	SSC	3.7*2.0*1.5	pT4aN0cM0	IVA	2nd primary	-	-
F: female, M:male, SSC: squamous cell carcinoma, TCC: transitional cell carcinoma
AJCC: the American Joint Committee on Cancer, CT: Chemotherapy, RT: Radiation Therapy
pTNM:
T: describes the size of the original tumor and whether it has invaded nearby tissue. N: describes nearby lymph nodes that are involved.
M: describes distant metastasis. c: stage is determined from evidence acquired before treatment. p: stage given by histopathologic examination of a surgical specimen.
y: stage assessed after chemotherapy and/or radiation therapy. r: stage for a recurrent tumor in an individual.
