# Supplementary material for: Mutation analysis of second primary tumors in head and neck cancer in Taiwanese patients through next-generation sequencing
Source: Research Square preprint supplement (doi:10.21203/rs.3.rs-948491/v1), 2021-10-05
Supplement: Supplementary file 5 [file c158fc3819d8c8d8af30db00.xlsx]

## Sheet: Table S1
Table S1. Primer list
Chromosome	position	GENE	primer Name	Sequence	product
chr13	46733796	LCP1	PA47-1-LCP1-1dupA-F1	GATGCAATTTGGGGTACCAG	241
			PA47-1-LCP1-1dupA-R1	TTCTAAATCATGGGGGATGC
chr16	11002917	CIITA	PA47-1-CIITA-2689G>A-F1	GGTAGGAGGACCCTTCATGG	239
			PA47-1-CIITA-2689G>A-R1	GAGTCTGCACAAGCTTTCCC
chr16	53468476	RBL2	PA47-1-RBL2-8C>G-F1	CAGCCCGTGCTCAAGACTAC	237
			PA47-1-RBL2-8C>G-R1	CTCCTCCTCCTCATCCGAG
chr2	202149867	CASP8	PA47-1CASP8-1087dupC-F1	TTGCTGGAAAACCCAAAGTG	159
			PA47-1CASP8-1087dupC-R1	GCAGAAAGTCAGCCTCATCC
chr20	60885789	LAMA5	PA47-1-LAMA5-10378G>A-F1	AAGATGGTTCTCACCGGAAG	206
			PA47-1-LAMA5-10378G>A-R1	CTACCCTGACCCATCTCCTG
chr8	32600224	NRG1	PA47-1-NRG1-665dupA-F1	TCAGTTCCTGAGGGTGAACTC	253
			PA47-1-NRG1-665dupA-R1	CAACAAGAAAGCAGCACCAA
chr9	134019982	NUP214	PA47-1-NUP214-1610C>G-F1	TCATCTGCTACGGTCACTGG	231
			PA47-1-NUP214-1610C>G-R1	AGCAGACACACTTGGCACTG
chr12	1953617	CACNA2D4	PA49-1-CACNA2D4-2421G>T-F1	AGAGCACAGCAGGAGGAGAG	219
			PA49-1-CACNA2D4-2421G>T-R1	ACATCTTCCTCCTTGCAGGA
chr17	78269536	RNF213	PA49-1-RNF213-1935T>A-F1	ACTTTTTGCCTGTGGACTGC	186
			PA49-1-RNF213-1935T>A-R1	GAGGTATCCCAAGGATGTGG
chr4	66231746	EPHA5	PA49-1-EPHA5-1957G>T-F1	CACATTGTCGTACCTGCTCC	279
			PA49-1-EPHA5-1957G>T-R1	AACTCAGGAGAGGGCTGGTC
chr18	22807188	ZNF521	PA50-1-ZNF521-34C>T-F1	CGTGGCAGTAGACACACTGG	281
			PA50-1-ZNF521-34C>T-R1	GACTCACACGTCCAACAAGC
chr4	153244187	FBXW7	PA50-1-FBXW7-1615_1616del-F1	AACTGCACACACCAGCTTTG	206
			PA50-1-FBXW7-1615_1616del-R1	TAGGTCCCAACAAGCATCAG
chr4	153244233	FBXW7	PA50-1-FBXW7-1570G>A-F1	AACTGCACACACCAGCTTTG	206
			PA50-1-FBXW7-1570G>A-R1	TAGGTCCCAACAAGCATCAG
chr1	11270951	MTOR	PA51-1-MTOR-3574A>T-F1	TTGACAATTCTGCAGATGAGC	210
			PA51-1-MTOR-3574A>T-R1	AGAGCTAGCCACAAACCCAG
chr10	63816906	ARID5B	PA51-1-ARID5B-148A>T-F1	GCTGTGCCTCGTCTGATGT	143
			PA51-1-ARID5B-148A>T-R1	ACTCTTCACCAATGGCAACC
chr12	49431727	KMT2D	PA51-1-KMT2D-9411_9412del-F1	CAAAGGAGGCCTTCTCAGC	329
			PA51-1-KMT2D-9411_9412del-R1	TAATGAGAAGGCTGAACGGG
chr17	9862547	GAS7	PA51-1-GAS7-305A>G-F1	GAGTGAAATCCGAGCTTTGG	236
			PA51-1-GAS7-305A>G-R1	GGAGAACAGCTTTGACGATG
chr22	41569728	EP300	PA51-1-EP300-4719G>A-F1	AAGGGAGACAGCAAAAATGC	228
			PA51-1-EP300-4719G>A-R1	TACAGGTGTGAGCCACCATG
chr5	176715889	NSD1	PA51-1-NSD1-6221_6227del-F1	TCTTGGGAGTTGGTATCCTTTG	254
			PA51-1-NSD1-6221_6227del-R1	GGTCCTCCCTCCCTAACAGT
chr6	393213	IRF4	PA51-1-IRF4-61A>C-F1	GCTCTTCTCCCCGCAGTG	211
			PA51-1-IRF4-61A>C-R1	TTCTCCTCGTTCTCCCACAC
chr9	136901402	BRD3	PA51-1-BRD3-1688C>G-F1	TTTCTATCTCGTCGGGGTTG	234
			PA51-1-BRD3-1688C>G-R1	CAACACCACGTTGCTCTGTC
chr19	15349729	BRD4	PA52-1-BRD4-3845G>A-F3	ACCAGGCCTCCAGACTCAC	259
			PA52-1-BRD4-3845G>A-R3	AGGAGCCGAGAGGACGAG
chr2	202131514	CASP8	PA54-1-CASP8-305G>A-F1	TGTTGGAGGAAAGCAATCTG	254
			PA54-1-CASP8-305G>A-R1	GGTTCCCAGGCACTAGGC
chr2	141625823	LRP1B	PA56-1-LRP1B-4179C>G-F1	GATGGTTTTTCTCCCAGCAC	253
			PA56-1-LRP1B-4179C>G-R1	TAGTCTGGCTCCTCCACTGG
chr2	212566890	ERBB4	PA56-1-ERBB4-1291G>A-F1	ATGTTTCCTGCGCTGATTTC	148
			PA56-1-ERBB4-1291G>A-R1	TGACAGCCTTATTTTACTCCGG
chr5	67591136	PIK3R1	PA56-1-PIK3R1-640_641insGAG-F1	AAGCAGGCAGCTGAGTATCG	170
			PA56-1-PIK3R1-640_641insGAG-R1	GAGAACGCATTAACTCATCCTG
chr1	51938620	EPS15	PA57-1-EPS15-76G>A-F2	CGCTACAAATTCCCTTCATCC	529
			PA57-1-EPS15-76G>A-R2	TTACAACCCCACGAATTTGC
chr22	28194773	MN1	PA59-1-MN1-1759G>T-F2	CATCCTCATCGGCTCCTG	500
			PA59-1-MN1-1759G>T-R2	AGTCCCTGCAACAGCAGC
chr6	51923351	PKHD1	PA59-1-PKHD1-1282delT-F2	ATCCCATGATGCTCTGCTTC	198
			PA59-1-PKHD1-1282delT-R2	TGCCTGGAAGCTGCATAGTA
chr12	43886318	ADAMTS20	PA46-2-ADAMTS20-1066C>T-F1	GTATCAGTCATGCAGGAGGG	266
			PA46-2-ADAMTS20-1066C>T-R1	TGCAGATGCTGATAAACTTGG
chr21	36164614	RUNX1	PA46-2-RUNX1-1180G>A-F1	GCCATGTTGGTGGGGGAGTTG	313
			PA46-2-RUNX1-1180G>A-R1	GCATCGGCATCGGCATGTC
chr3	47155487	SETD2	PA46-2-SETD2-4594C>T-F1	CGAAGGAAGGTCTTTGGCAGCTC	302
			PA46-2-SETD2-4594C>T-R1	GGAATCCCTTTGTGATGGAAGGAA
chr7	106508220	PIK3CG	PA46-2-PIK3CG-214G>A-F1	CTCATCCCCATCGAGTTCGT	240
			PA46-2-PIK3CG-214G>A-R1	CACCACCTGGTACTTGTCGT
chr8	71068403	NCOA2	PA46-2-NCOA2-2197G>A-F1	GTCACCAGGCTCAAAGCTCATC	322
			PA46-2-NCOA2-2197G>A-R1	GCACAGACTCTTGCAGGACAGC
chr8	103284871	UBR5	PA52-2-UBR5-6859G>T-F1	AGTACTTACTTGTGTGGGTGCC	200
			PA52-2-UBR5-6859G>T-R1	TCACTTTGGTCGAAGATGTGC
chr1	235345671	ARID4B	PA57-2-ARID4B-2563G>C-F1	CCTCCAAACCATTGTATTTCTTAGTTGG	237
			PA57-2-ARID4B-2563G>C-R1	AGGATGTCAAGAAGGACACAACA
chr11	106849369	GUCY1A2	PA57-2-GUCY1A2-463C>T-F1	CAAGGTCTGGGTCTCAACTTGCC	349
			PA57-2-GUCY1A2-463C>T-R1	GATGAAAGCATAGACTGCGTG
chr12	112237764	ALDH2	PA57-2-ALDH2-1303G>T-F1	CTCTGAGAGAGCTCGATGGCAG	235
			PA57-2-ALDH2-1303G>T-R1	GGCTCTTACCACACAGTGCCC
chr14	81610465	TSHR	PA57-2-TSHR-2063A>C-F1	ATGCATGGCCCCAATCTCATTC	291
			PA57-2-TSHR-2063A>C-R1	AGACCCTGCCTCATCTCGTG
chr4	66280107	EPHA5	PA57-2-EPHA5-1582G>T-F1	TGTTAACCTGCCGACCTACC	338
			PA57-2-EPHA5-1582G>T-R1	ACCAAGAGACCAGCTACACG
chr4	160277266	RAPGEF2	PA57-2-RAPGEF2-4430G>T-F1	GGACTACAACGTGGCCCTTCA	261
			PA57-2-RAPGEF2-4430G>T-R1	TTGGGAAGCAGCACAAGTGAAC
chr9	139418317	NOTCH1	PA57-2-NOTCH1-254_255del-F1	AGTACCTCAAGTTGCCTGGG	300
			PA57-2-NOTCH1-254_255del-R1	CCAACCCGTGCCTCAGCACC
chr7	106509874	PIK3CG	PA47-IS-PIK3CG-1868A>C-F1	TAACCCTCTCACAGCAGAGGA	315
			PA47-IS-PIK3CG-1868A>C-R1	ACATCCCCTACCTGGACCAAT
chr12	43822472	ADAMTS20	PA48-IS-ADAMTS20-3620C>A-F1	GGCGAACTTCAGGATCACAGT	350
			PA48-IS-ADAMTS20-3620C>A-R1	AGAGGTACTCAAGCCCGCTA
chr2	48132791	FBXO11	PA48-IS-FBXO11-69G>C-F1	GACGTTGTTCCGCTCCTG	222
			PA48-IS-FBXO11-69G>C-R1	ATGAACTCCGTCCGAGCCG
chr12	6762189	ING4	PA49-IS-ING4-304A>G-F1	CTCCCTTTCAGTCCTCGCCC	335
			PA49-IS-ING4-304A>G-R1	CTGTTCATGGCTCCCCACCTAC
chr12	132547094	EP400	PA49-IS-EP400-8182_8187del-F1	TGCTGCTTGCTGTCTGAGAA	349
			PA49-IS-EP400-8182_8187del-R1	GCACACGTTCATGGTCCTCT
chr18	56402468	MALT1	PA49-IS-MALT1-1510T>A-F1	CCACCATTCTGCTGGGTGCTTC	243
			PA49-IS-MALT1-1510T>A-R1	CTTCTGCAACTTCATCCAGTAACAC
chr3	14190206	XPC	PA49-IS-XPC-2276T>C-F1	GCCGCCATGGAAATCAAAGCC	229
			PA49-IS-XPC-2276T>C-R1	GCATCAGAAGGGCTCAGGACC
chr19	11098368	SMARCA4	PA49-IS-SMARCA4-886A>C-F1	GCTTTCCATTTCCAGCCCGGG	252
			PA49-IS-SMARCA4-886A>C-R1	CTGGTGCAGTGGCACCATGG
chr9	139401330	NOTCH1	PA50-IS-NOTCH1-3739C>T-F1	GTGGAAGTCATTGACGCGCT	218
			PA50-IS-NOTCH1-3739C>T-R1	TCAACGTGGACGACTGCAA
chr20	40126851	CHD6	PA51-IS-CHD6-931C>A-F1	CATATAAAACCCAAATACAGAGAATAC	260
			PA51-IS-CHD6-931C>A-R1	TGACCAATAGGTGTCAGGAAAA
chr22	40814538	MKL1	PA51-IS-MKL1-1904T>C-F1	CTGTAGCGAGACGCTCTTCCC	312
			PA51-IS-MKL1-1904T>C-R1	CCAACCACATAGACCCTTG
chr22	41574780	EP300	PA51-IS-EP300-7065G>C-F1	CCTACAAGGCCAGCAGATCCC	290
			PA51-IS-EP300-7065G>C-R1	CGCTTGCACCATGGAGGTTTGC
chr3	172241114	TNFSF10	PA51-IS-TNFSF10-61A>T-F1	CTGACCTGCTTCAGCTCGTTGG	298
			PA51-IS-TNFSF10-61A>T-R1	CAGTTGCAGGTTCAATAGATGTGG
chr9	123875856	CNTRL	PA51-IS-CNTRL-1199C>T-F1	TGTCATTTGACTGCTTGGAGA	238
			PA51-IS-CNTRL-1199C>T-R1	GGTGTGTGGCCTCTCAAGTT
chr17	59760708	BRIP1	PA52-IS-BRIP1-3699C>A-F1	AAAACCAGGAAACATGCCTTT	205
			PA52-IS-BRIP1-3699C>A-R1	TTCAGCCAGAGAAGTGAAAGC
chr2	202149550	CASP8	PA52-IS-CASP8-769A>G-F1	CTCCAGCTGTGGTCTGTGAA	213
			PA52-IS-CASP8-769A>G-R1	TCCATGGGAGAGGATACAGC
chr6	160445671	IGF2R	PA52-IS-IGF2R-581G>A-F1	TGGAGAGCAGTGTTGTGTGA	271
			PA52-IS-IGF2R-581G>A-R1	GAAGAAATCCCTCACCACCA
chr14	45623933	FANCM	PA53-IS-FANCM-1139A>T-F1	AGGGATGACACGGTCAAAAA	134
			PA53-IS-FANCM-1139A>T-R1	CCAGACCTTGTTGGATAGCAG
chr2	47635594	MSH2	PA53-IS-MSH2-266T>C-F1	AGAATCTGCAGAGTGTTGTGCT	130
			PA53-IS-MSH2-266T>C-R1	TCATTCTCCTTGGATGCCTTA
chr5	149459899	CSF1R	PA53-IS-CSF1R-308A>G-F1	CCAGGGCGAGAAGGAGTAGT	206
			PA53-IS-CSF1R-308A>G-R1	AGGGCAGTTGTAACCCTGTG
chr9	95179780	OMD	PA53-IS-OMD-61C>T-F1	AGCATTCACTGACACAGCCTAA	242
			PA53-IS-OMD-61C>T-R1	CAATGTTTCCTTTTCTCCTTGC
chr19	36224333	KMT2B	PA54-IS-KMT2B-6883T>G-F1	CTCCCACCTCCTGGACTCT	246
			PA54-IS-KMT2B-6883T>G-R1	TATCCTCTGAGGCCTCTCCA
chr5	67522747	PIK3R1	PA54-IS-PIK3R1-244A>G-F1	GGACTTTCCGGGAACTTACG	280
			PA54-IS-PIK3R1-244A>G-R1	CCAAGCTTTTATGCACCACA
chr11	120300425	ARHGEF12	PA55-IS-ARHGEF12-611T>A-F1	AAATGTGAGTGGGCATGGTT	245
			PA55-IS-ARHGEF12-611T>A-R1	TCTTGCAGCTGAGGAATGTG
chr3	14199566	XPC	PA55-IS-XPC-1817C>T-F1	GGGCTCTGGTATGGTCTCAA	232
			PA55-IS-XPC-1817C>T-R1	GTGAGCAGGAGGAAAAGTGG
chr9	139412376	NOTCH1	PA55-IS-NOTCH1-1269C>G-F1	GTGTAGCCCTGCAGACACTG	230
			PA55-IS-NOTCH1-1269C>G-R1	CCCAGAACCGATGAGAAGTC
chr11	120352086	ARHGEF12	PA56-IS-ARHGEF12-4298A>C-F1	CAGTGCAGGAGAGTTCCACA	226
			PA56-IS-ARHGEF12-4298A>C-R1	TCTGCACAAGAGGAGGGACT
chr19	36218158	KMT2B	PA56-IS-KMT2B-4105G>T-F1	CGCTGCTATGAAGACAACGA	289
			PA56-IS-KMT2B-4105G>T-R1	GCAGTCCTGAAAGGATCTCG
chr10	81463533	NUTM2B	PA57-IS-NUTM2B-168delT-F1	CGAAGCCCTTCACAGAAC	282
			PA57-IS-NUTM2B-168delT-R1	GCAGACTCAGATAATGCCCT
chr17	40475159	STAT3	PA57-IS-STAT3-1751A>G-F1	CCTTCTCCACCCAAGTGAAA	259
			PA57-IS-STAT3-1751A>G-R1	TTGGAACGAAGGGTAGGTTG
chr17	78921038	RPTOR	PA57-IS-RPTOR-2678G>T-F1	TCCAACAGTCCTCCTGCTTC	277
			PA57-IS-RPTOR-2678G>T-R1	TCCTGGCCGTTCAGATACTC
chr20	41400106	PTPRT	PA57-IS-PTPRT-653A>C-F1	CTCACAAGCCCAGACCTCTC	255
			PA57-IS-PTPRT-653A>C-R1	CATTTCAGTGCATTGCTGGT
chr7	137569774	CREB3L2	PA57-IS-CREB3L2-1048C>T-F1	CAACTTGCCACATGCTGTCT	209
			PA57-IS-CREB3L2-1048C>T-R1	GTCCAGAGGCTGAAGTCCAC
chr5	180043435	FLT4	PA58-IS-FLT4-3151G>T-F1	CTCTCCTGGACAGGCAGTCT	207
			PA58-IS-FLT4-3151G>T-R1	CAGTGCATCCACAGAGACCT
chr6	117680982	ROS1	PA58-IS-ROS1-3638C>G-F1	CCCAGGCTCTAACACAGCAT	288
			PA58-IS-ROS1-3638C>G-R1	TGCTGAAGGGGACTCACTCT
chr10	81466254	NUTM2B	PA59-IS-NUTM2B-839C>T-F1	GTGAAGGCCGCTCAGGCG	304
			PA59-IS-NUTM2B-839C>T-R1	GGGAGGAAGCCAGGCTGCT
chr17	78302241	RNF213	PA59-IS-RNF213-3481C>A-F1	GGATGAACAATGTGCTGTGG	266
			PA59-IS-RNF213-3481C>A-R1	CCCAGCAAATGCAAATTAAAA
chr8	38297862	FGFR1	PA59-IS-FGFR1-29A>G-F1	TGGCTTTGAAATGGAACTGA	164
			PA59-IS-FGFR1-29A>G-R1	TCTATTTGGGGACTCCGAGA
chr1	186303597	TPR	PA60-IS-TPR-5042T>C-F1	TGGGCATCACTGTAGCTGTT	191
			PA60-IS-TPR-5042T>C-R1	TCAAGCCAACTCCTGTTGTG
chr2	42557157	EML4	PA60-IS-EML4-2582C>G-F1	TGGTGGAAAAGACATGAGCA	249
			PA60-IS-EML4-2582C>G-R1	TCACTTGGCTCCACAGTTTG
